# Supplementary material for: A two-pocket Schiff-base molecule as a chemosensor for Al3+
Source: Royal Society of Chemistry journal article supplement (doi:10.1039/c7nj02067h), 2017-01-01
Supplement: c7nj02067h1.pdf [file c7nj02067h1.pdf]

**Electronic Supplementary Information**

**A two pocket Schiff-base molecule as chemosensor for Al<sup>3+</sup>**

Dinesh Maity, Sudipto Dey and Partha Roy\*

Department of Chemistry, Jadavpur University, Jadavpur, Kolkata-700 032, India

E-mail: [proy@chemistry.jdvu.ac.in](mailto:proy@chemistry.jdvu.ac.in)

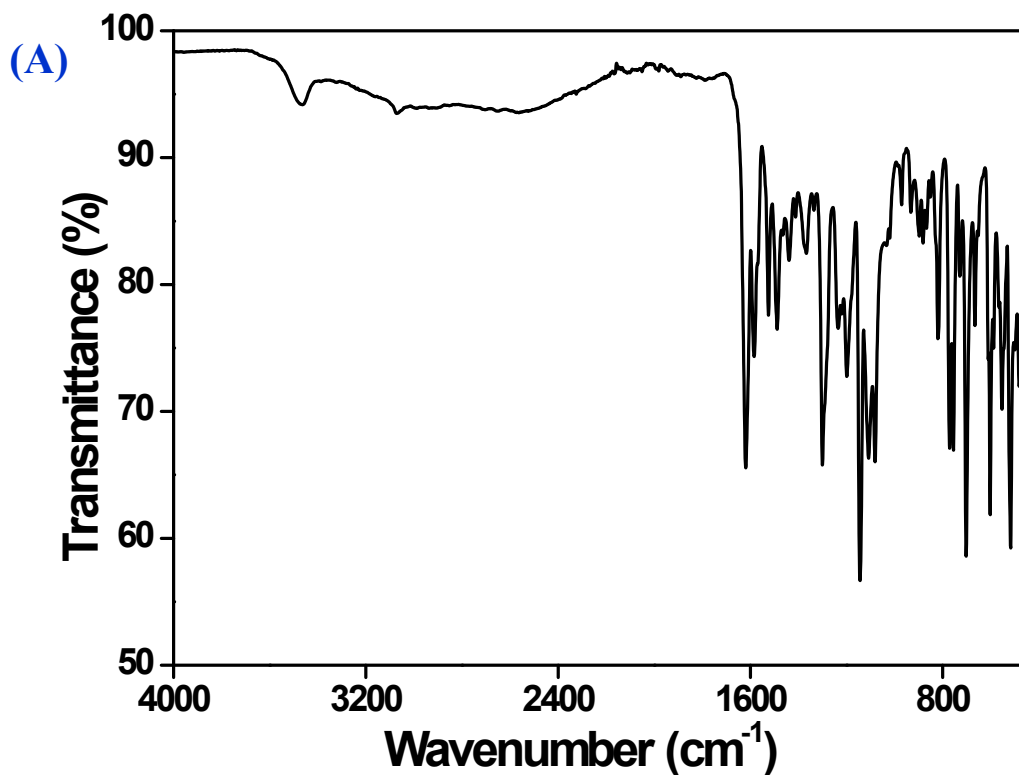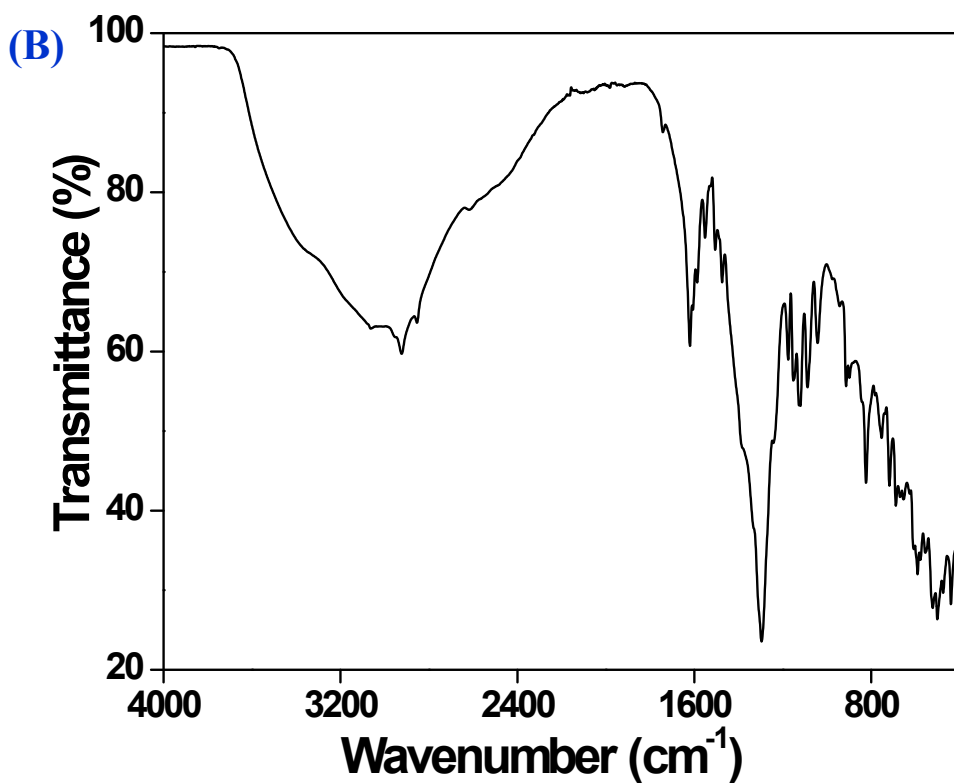

Fig. s1: FT-IR spectra of  $\text{H}_4\text{L}$  (A) and its complex with  $\text{Al}^{3+}$  (B).

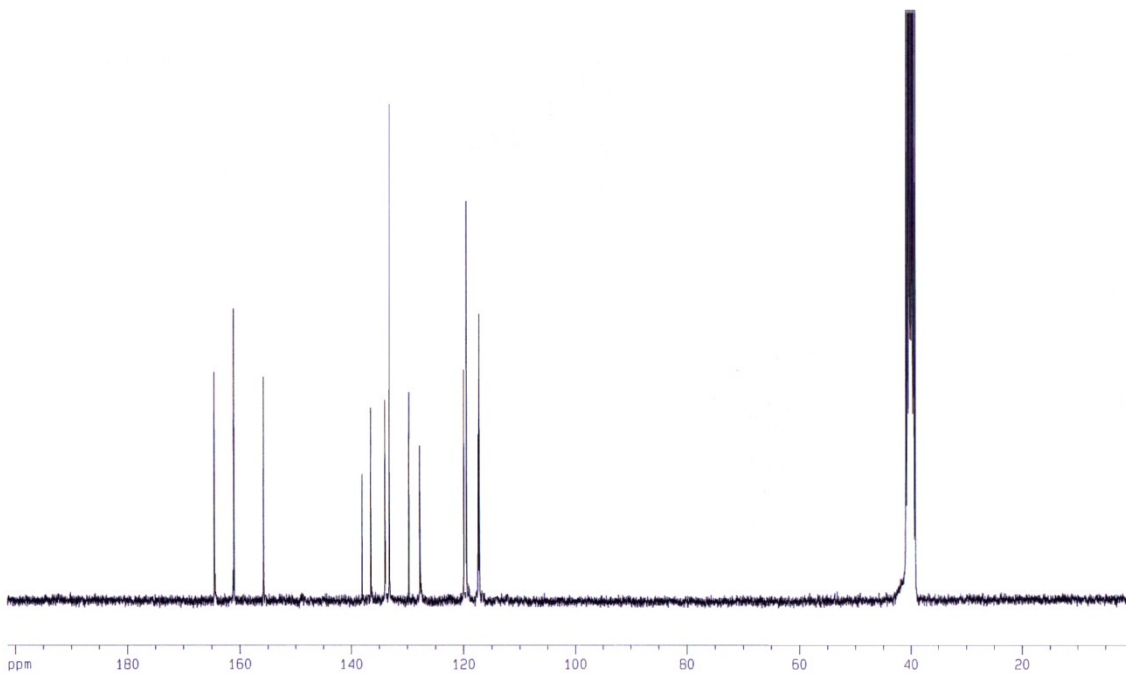

Fig. s2:  $^{13}\text{C}$  NMR of  $\text{H}_4\text{L}$  in  $\text{DMSO-d}_6$ .

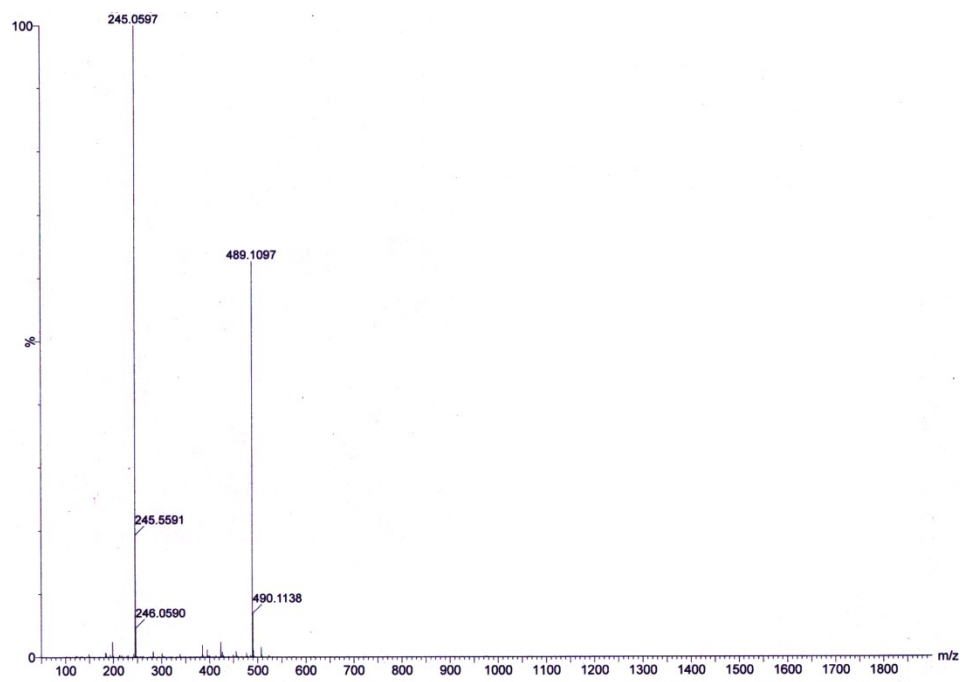

Fig. s3: ESI mass spectrum of  $\text{H}_4\text{L}$  in methanol.

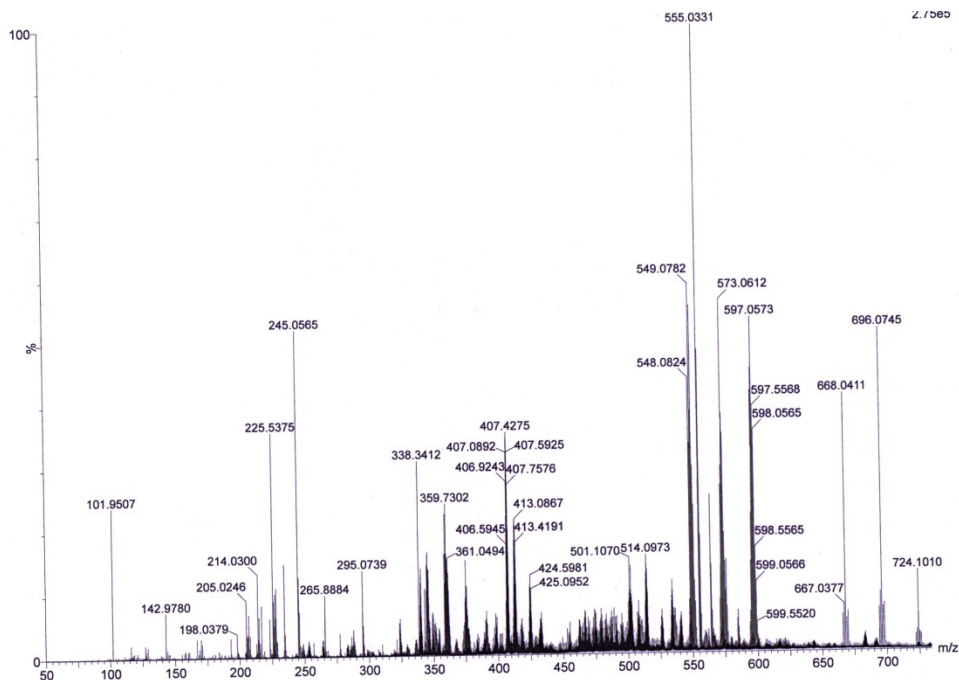

Fig. s4: ESI mass spectrum of  $H_4L$  in the presence of  $Al^{3+}$  in methanol.

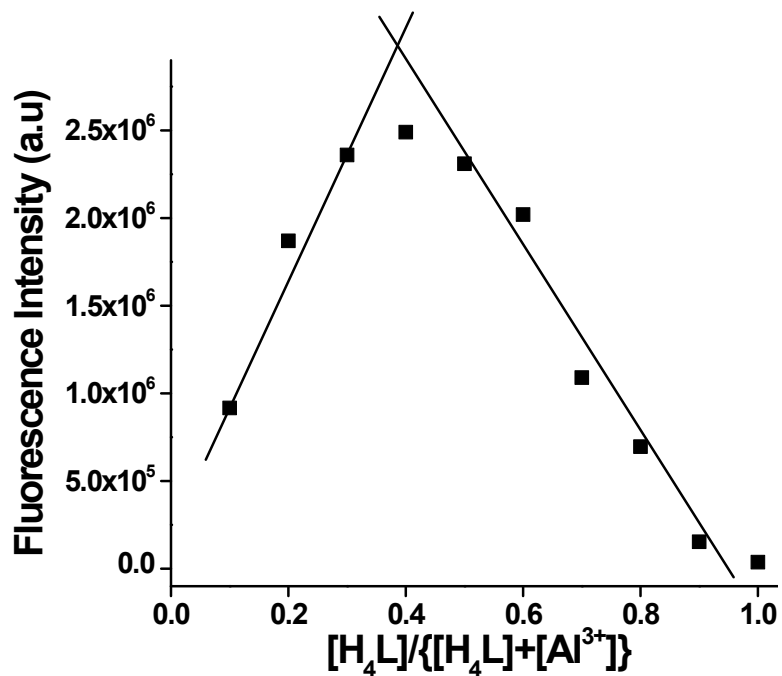

Fig. s5: Job's Plot showing 1:2 (ligand/metal) complex formation

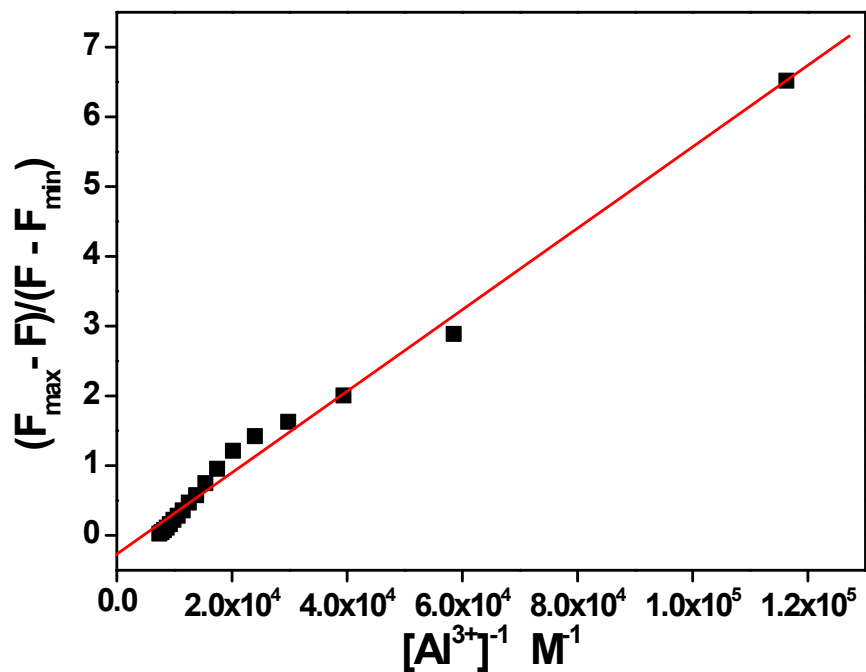

Fig. s6: Plot of  $(F_{\max} - F_0)/(F - F_0)$  vs.  $1/[Al^{3+}]$ . Binding constant,  $K$  has been determined from the slope as  $1.712 \times 10^4 M^{-1}$ .

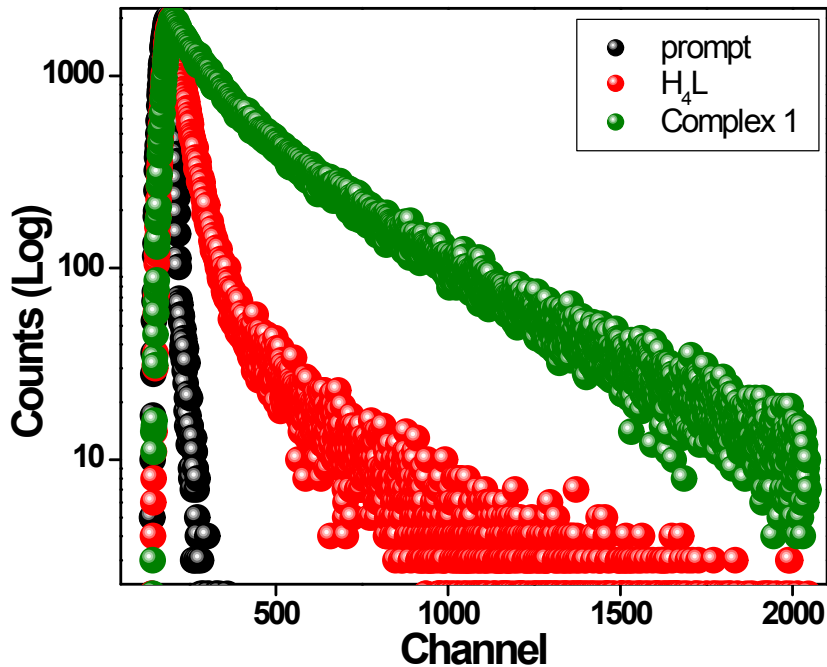

Fig. s7: Fluorescence decay patterns of H<sub>4</sub>L and complex 1.

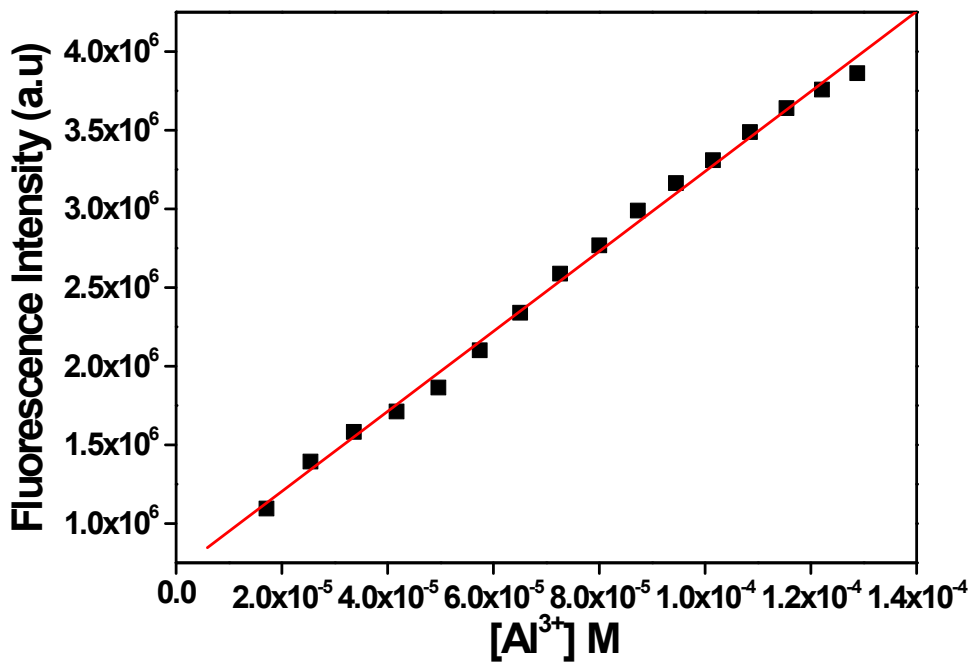

Fig. s8: Linear dynamic plot of F.I. (at 485 nm) vs. [Al<sup>3+</sup>] for the determination of S (slope). Slope =  $2.5419 \times 10^{10} \pm 0.0425$  and R = 0.99805.

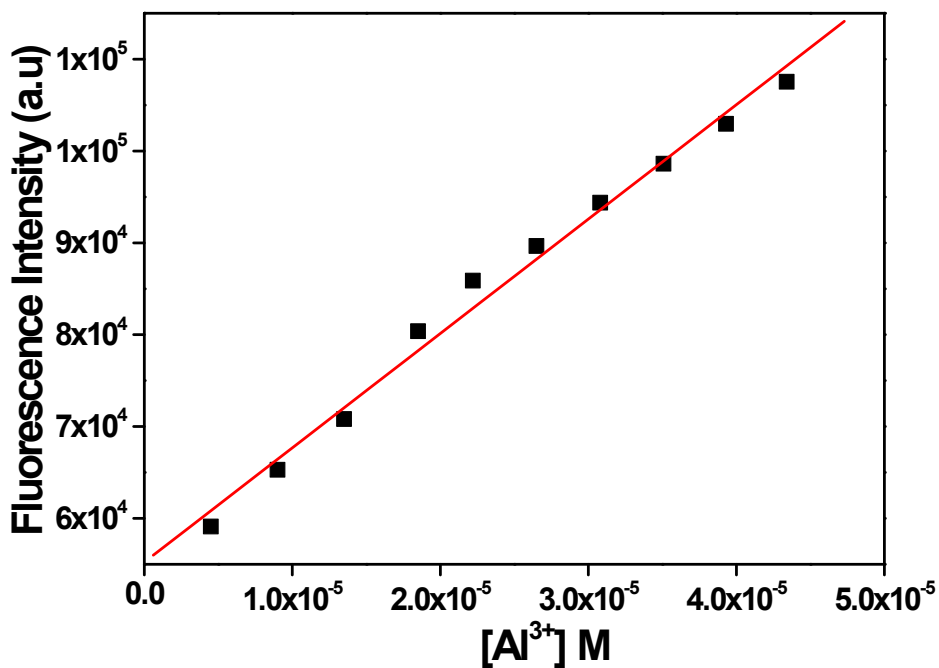

Fig. s9: Determination of Sb1 of the blank. Standard Deviation = 1824.68 and R = 0.99445.

Table s1: Selected bond lengths and bond angles for Lig and Lig-Al<sup>3+</sup> complex in the ground state calculated at B3LYP Levels.

|                                               |          |                |              |                 |
|-----------------------------------------------|----------|----------------|--------------|-----------------|
| H <sub>4</sub> L                              | Bond     | Bond length(Å) | Bond angle   | Angle( degree ) |
|                                               | O35-H55  | 0.9627         | O35-C24-C22  | 117.728         |
|                                               | C24-O35  | 1.3636         | C22-C20-N17  | 122.575         |
|                                               | C22-C24  | 1.4108         | C20-N17-C14  | 122.295         |
|                                               | C20-C22  | 1.4603         | N17-C14-C13  | 113.879         |
|                                               | C20-H44  | 1.0915         | C14-C13-O16  | 119.442         |
|                                               | N17-C20  | 1.2827         | O19-C1-C6    | 119.655         |
|                                               | C14-C13  | 1.4170         | C6-N18-C21   | 122.062         |
|                                               | C13-O16  | 1.3444         | N18-C21-C23  | 123.387         |
|                                               | O16-H42  | 0.9755         | C21-C23-C33  | 121.037         |
|                                               | O19-H43  | 0.9743         | C23-C33-O34  | 123.966         |
|                                               | C1-C6    | 1.4162         |              |                 |
|                                               | C6-N18   | 1.4013         |              |                 |
|                                               | N18-C21  | 1.2822         |              |                 |
|                                               | C21-H45  | 1.0981         |              |                 |
|                                               | C21-C23  | 1.4574         |              |                 |
|                                               | C23-C33  | 1.4129         |              |                 |
|                                               | C33-O34  | 1.3624         |              |                 |
|                                               | O34-H54  | 0.9618         |              |                 |
| H <sub>4</sub> L<br>-Al <sup>3+</sup> complex | Bond     | Bond length(Å) | Bond angle   | Angle (degree)  |
|                                               | Al37-O28 | 1.8200         | N17-Al37-O28 | 109.500         |
|                                               | O28-C27  | 1.8412         | O16-Al37-O28 | 109.500         |
|                                               | C27-C22  | 1.3371         | O28-C27-C22  | 134.954         |
|                                               | C22-C20  | 1.3370         | C22-C20-N17  | 120.001         |
|                                               | C20-N17  | 1.2660         | C20-N17-C6   | 129.002         |
|                                               | N17-C6   | 1.2661         | O16-C1-C6    | 111.002         |
|                                               | C6-C1    | 1.3369         | N18-Al36-O34 | 103.838         |
|                                               | C1-O16   | 1.2250         | O34-Al36-O35 | 141.128         |

|          |        |             |         |
|----------|--------|-------------|---------|
| Al37-O16 | 1.7122 | O34-C29-C21 | 124.303 |
| Al37-N17 | 1.8560 | C21-C19-N18 | 120.006 |
| Al36-O34 | 1.1695 | C19-N18-C12 | 129.003 |
| O34-C29  | 1.3550 | O35-C11-C12 | 110.997 |
| C29-C21  | 1.3369 |             |         |
| C21-C19  | 1.3370 |             |         |
| C19-N18  | 1.2660 |             |         |
| N18-C12  | 1.2660 |             |         |
| C12-C11  | 1.3370 |             |         |
| C11-O35  | 1.2250 |             |         |
| O35-Al36 | 1.8917 |             |         |
| Al36-N18 | 1.8561 |             |         |
